# Supplementary material
Source: PubMed Central journal article supplement (PMC2660564)
Supplement: supp_40_4_491__1.pdf [file supp_40_4_491__1.pdf]

# **Human Alveolar Macrophage Gene Responses to *Mycobacterium tuberculosis* Strains H37Ra and H37Rv**

Richard F. Silver<sup>1,2,3</sup>, Jessica Walrath<sup>1,3</sup>, Hung Lee<sup>1,3</sup>, Bruce A. Jacobson<sup>4</sup>, Heidi Horton<sup>4</sup>,  
Michael R. Bowman<sup>4</sup>, Karl Nocka<sup>4</sup>, and Joseph P. Sypek<sup>4</sup>

<sup>1</sup>Division of Pulmonary, Critical Care and Sleep Medicine, Case Western Reserve University School of Medicine, Cleveland, Ohio; <sup>2</sup>University Hospitals Case Medical Center, Cleveland, Ohio; and <sup>3</sup>Louis Stokes Department of Veterans Affairs Medical Center, Cleveland Ohio, and <sup>4</sup>Wyeth Research, Cambridge, Massachusetts

**Online Data Supplement**
